# Supplementary material
Source: ML conference proceedings conference paper supplement (https://openaccess.thecvf.com/content/ACCV2022/html/Xu_DHG-GAN_Diverse_Image_ACCV_2022_paper.html)
Supplement: Supplementary file 1 [file Xu_DHG-GAN_Diverse_Image_ACCV_2022_supplemental.pdf]

# DHG-GAN: Diverse Image Outpainting via Decoupled High Frequency Semantics Supplementary Material

Yiwen Xu<sup>1</sup>[0000-0002-7914-3594], Maurice Pagnucco<sup>1</sup>[0000-0001-7712-6646], and  
Yang Song<sup>\*1</sup>[0000-0003-1283-1672]

School of Computer Science and Engineering, University of New South Wales,  
Sydney, Australia  
yiwen.xu@student.unsw.edu.au, {morri,yang.song1}@unsw.edu.au

In this supplementary material, we present more experimental results.

- We demonstrate visualisation results of the performance impact on different stylemap sizes.
- We provide additional diverse outpainting results of our method.

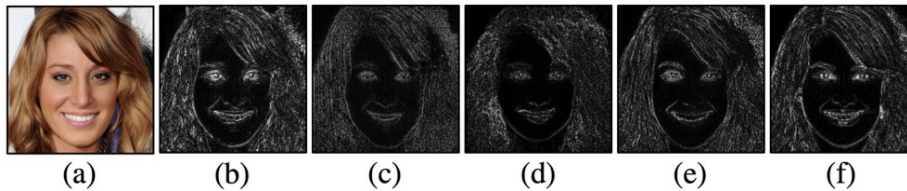

**Fig. 1.** Results of encoder inverse mapping performance using different stylemap sizes. (a) Original image. (b) Decoupled high-frequency information from original image. (c) Using  $4 \times 4 \times 32$  stylemap. (d) Using  $4 \times 4 \times 64$  stylemap. (e) Using  $8 \times 8 \times 32$  stylemap. (f) Using  $8 \times 8 \times 64$  stylemap.

---

\* Corresponding authors.

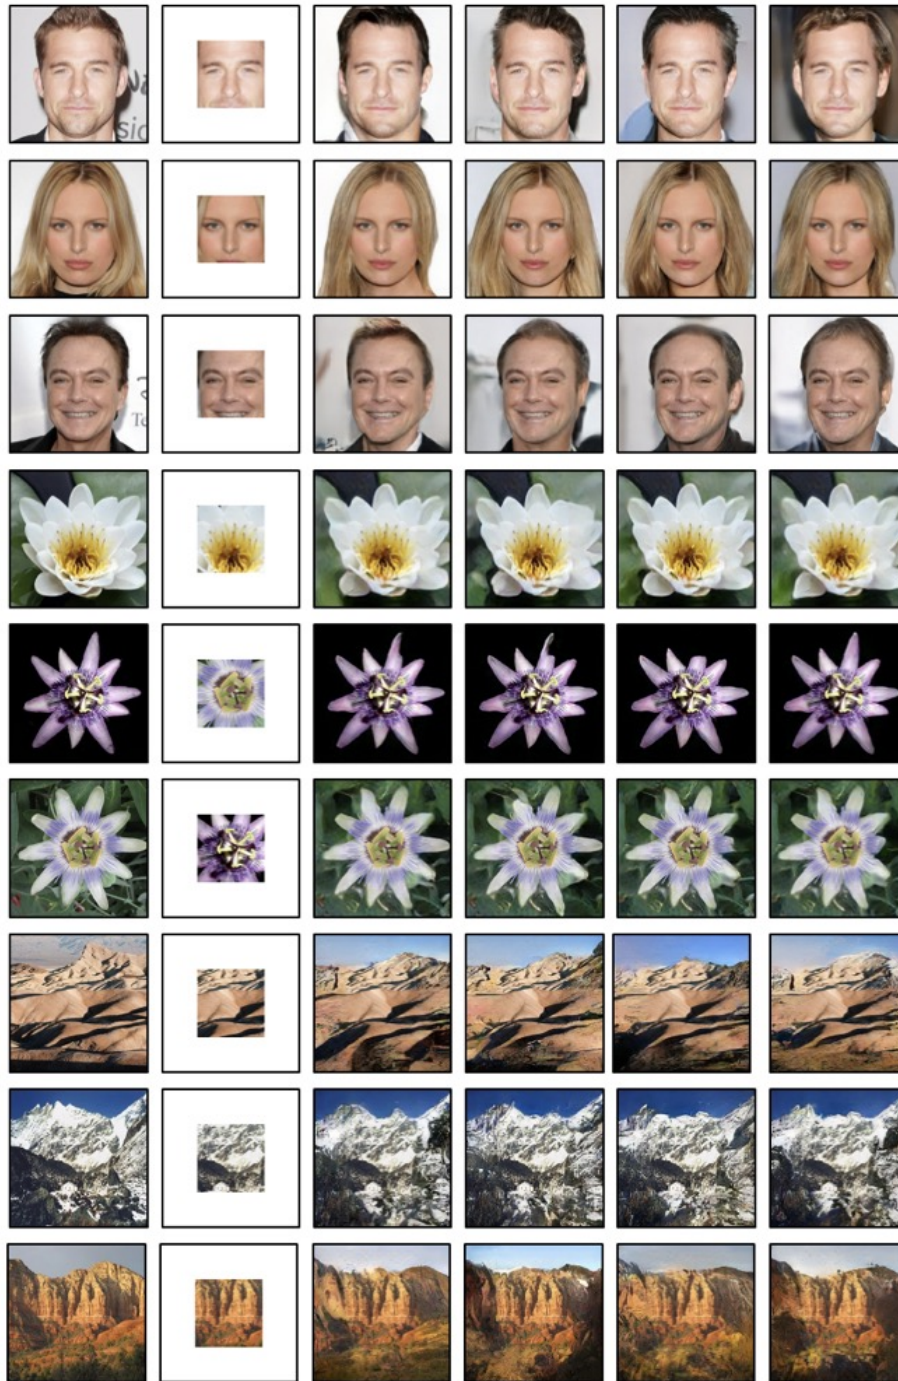

**Fig. 2.** The additional diverse inpainting results of our method on CelebA-HQ, Oxford Flower102 and Place2 datasets.
